# Supplementary material
Source: PubMed Central journal article supplement (PMC7685983)

**A**

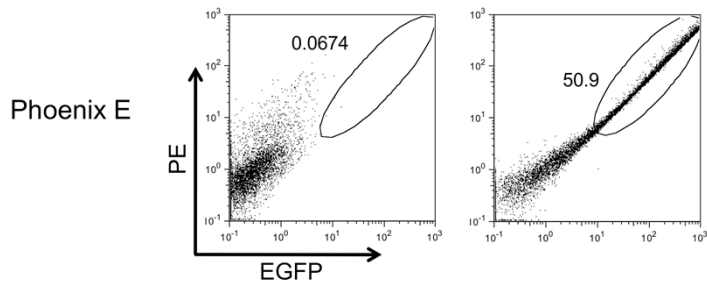

**B**

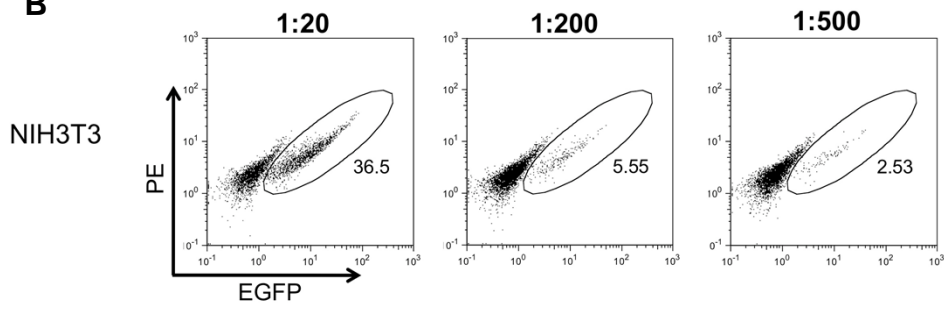

**C**

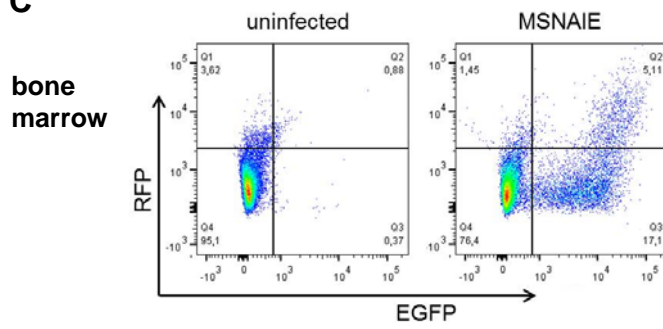

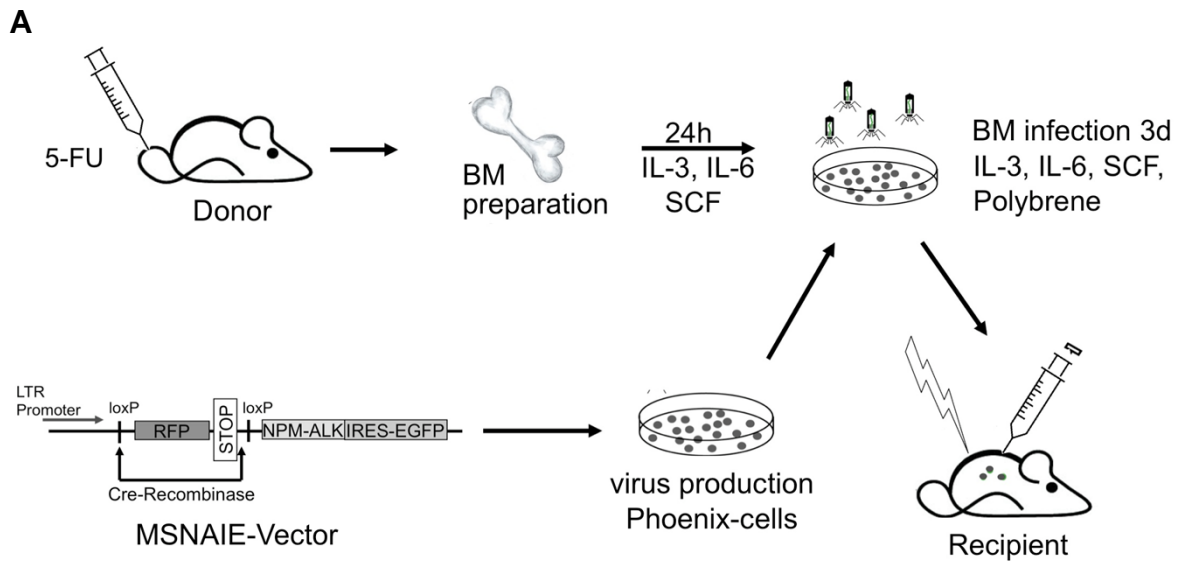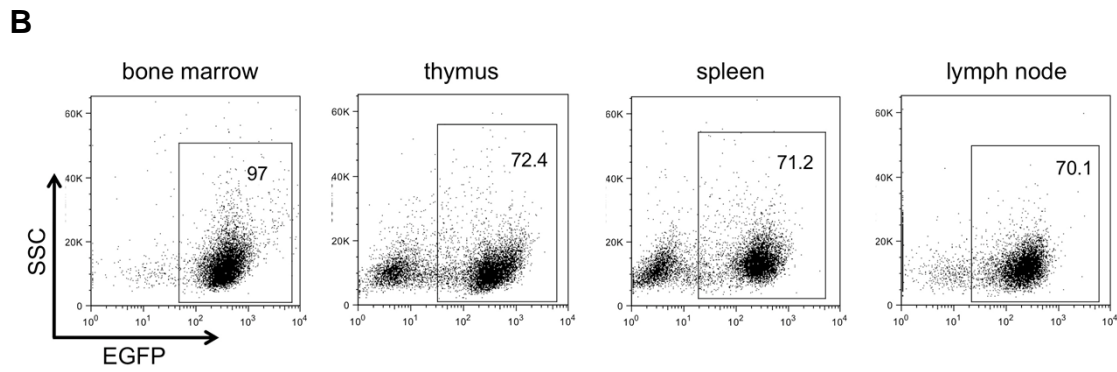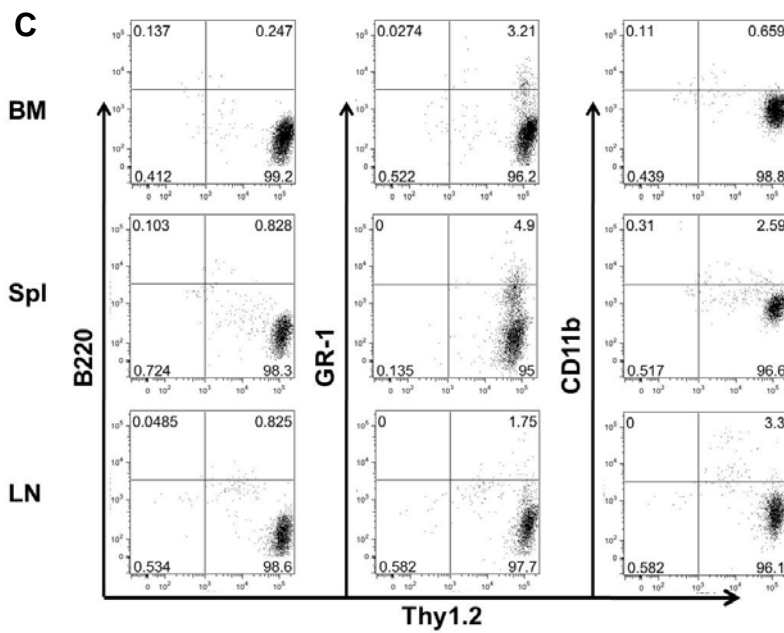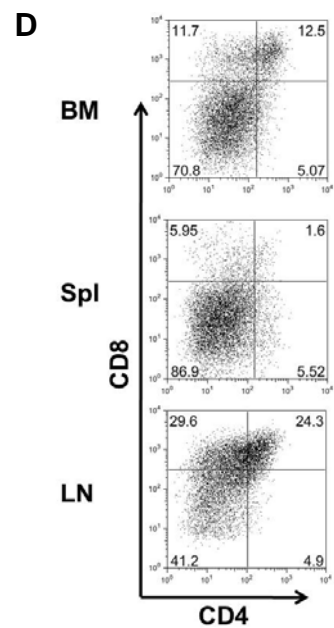

Suppl. Figure 2

**A**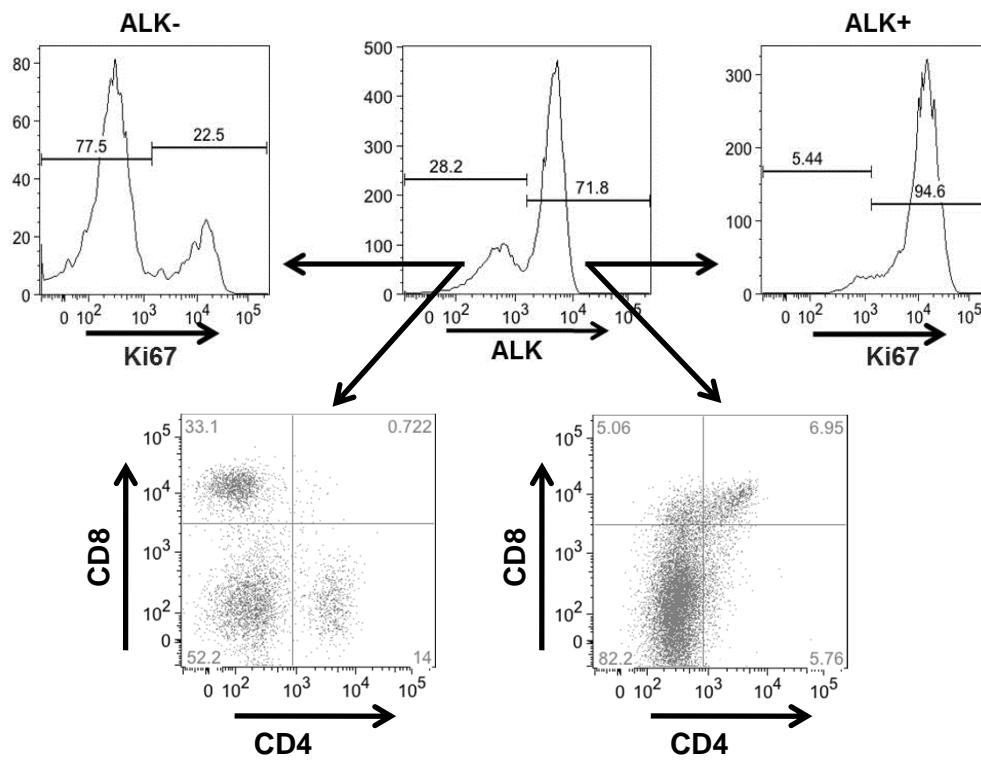**B**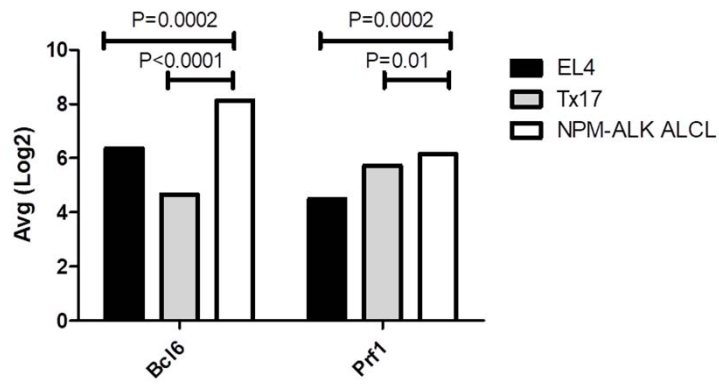

**A**

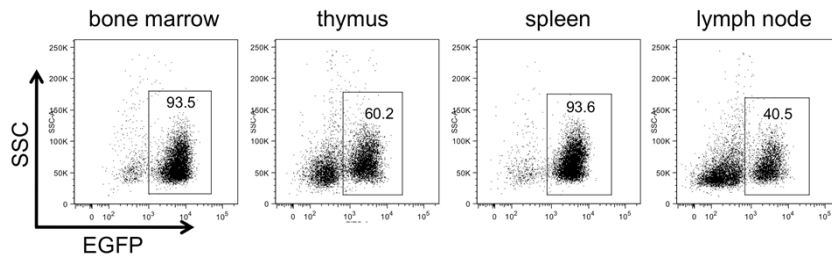

**A**

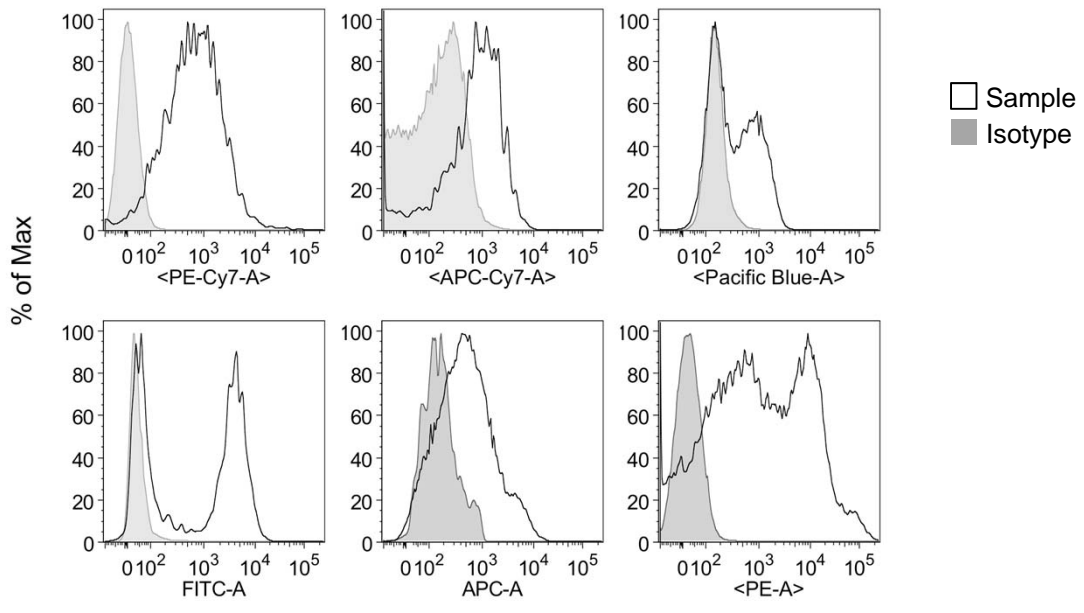

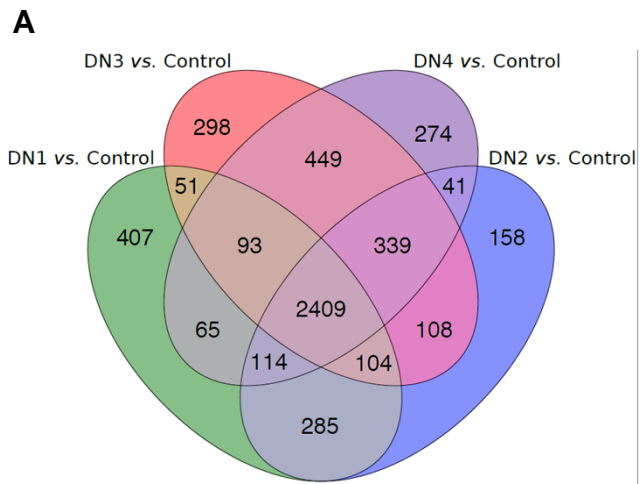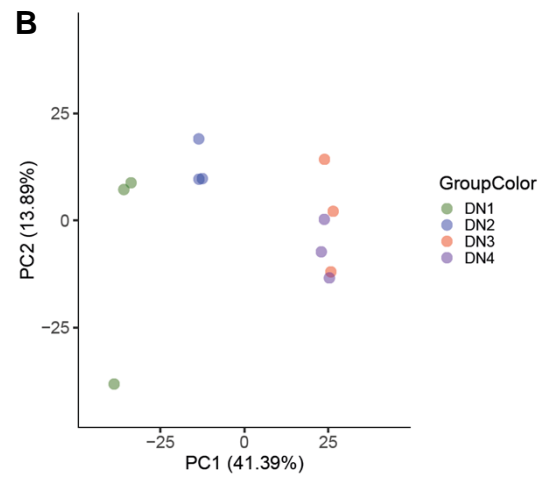

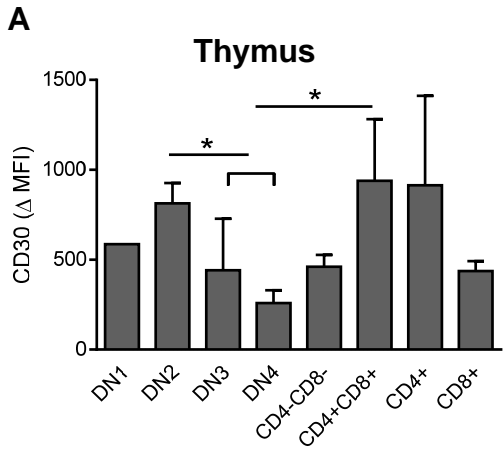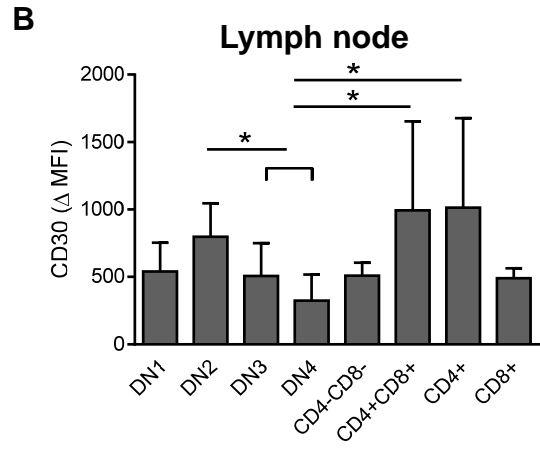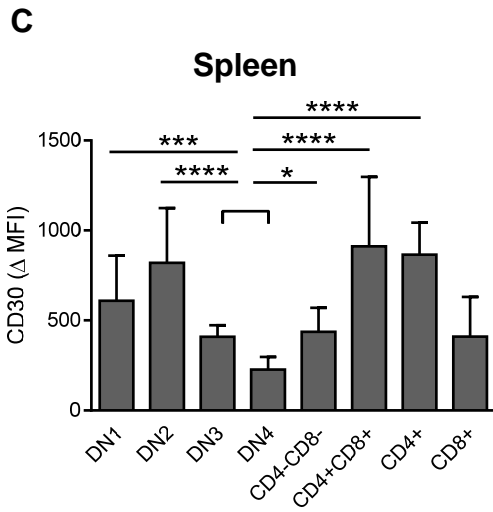

Supplement: 41375_2020_789_MOESM2_ESM.pdf [file 41375_2020_789_MOESM2_ESM.pdf]
